# Supplementary material
Source: publisher site journal article supplement (https://www.dovepress.com/article/480554)
Supplement: Supplementary file 1 [file get_supplementary_file.php]

**Supplementary Data**

S1. Magnetic resonance imaging sequences and parameters

S2. Detailed description of TACE procedure

S3. Selection of the intratumoral and peritumoral radiomics features

S4. The formulae of the logistic regression model in predictive models

S5. Delong testing for comparison between performance of models

**Supplementary Data S1. Magnetic resonance imaging sequences and parameters**

| **Sequence** | **TR/ms** | **TE/ms** | **ST/mm** | **Spacing/mm** | **Matrix Size** | **FOV/mm** | **Fat suppression** |
| --- | --- | --- | --- | --- | --- | --- | --- |
| **Siemens Avanto 1.5Tesla (32-channel body array coil)** | | | | | | | |
| **Contrast-enhanced imaging with T1-weighted 3D GRE** | 4.7 | 2.4 | 4 | 1.8 | 220×320 | 380 | Yes |
| **T1-weighted imaging** | 7.7 | 4.7 | 4 | 1.8 | 220×320 | 380 | No |
| **T2-weighted imaging 2D FSE** | 3062 | 78 | 6.5 | 7.8 | 240×320 | 380 | Yes |
| **Diffusion-weighted imaging** | 5300 | 75 | 6 | 7.2 | 156×192 | 380 | Yes |
| **GE medical system discovery MR750 3.0 Tesla (32-channel body array coil)** | | | | | | | |
| **Contrast-enhanced imaging with T1-weighted 3D GRE** | 3.7 | 1.7 | 5 | 2.5 | 512×512 | 380 | Yes |
| **T1-weighted imaging** | 3.7 | 1.6 | 5 | 2.5 | 400×360 | 380 | No |
| **T2-weighted imaging 2D FSE** | 5000 | 76.1 | 6 | 7 | 512×512 | 380 | Yes |
| **Diffusion-weighted imaging** | 7500 | 54.4 | 6 | 7 | 256×256 | 380 | Yes |
| **Siemens Verio 3.0 Tesla (32-channel body array coil)** | | | | | | | |
| **Contrast-enhanced imaging with T1-weighted 3D GRE** | 4.0 | 1.4 | 3 | 1.5 | 240×320 | 360 | Yes |
| **T1-weighted imaging** | 5.4 | 2.4 | 3 | 1.5 | 240×320 | 360 | No |
| **T2-weighted imaging 2D FSE** | 5116.5 | 78 | 6 | 7.8 | 240×320 | 360 | Yes |
| **Diffusion-weighted imaging** | 4735.7 | 68 | 6 | 7.8 | 200×280 | 360 | Yes |
| **Note: TR = repetition time; TE = echo time; ST = section thickness; FOV = field of view** | | | | | | | |

**Supplementary Data S2. Detailed description of TACE procedure**

The percutaneous puncture of femoral artery or radial artery and subsequent insertion of 5F-RH catheter sheath (Terumo, Tokyo, Japan) were performed with Seldinger technique. Subsequently, angiography of superior mesenteric artery and abdominal trunk was conducted. To demonstrate the origin of the hepatic artery and the branches supplying tumor arteries. Microcatheters (Merit Maestro, , USA) guided by microguides (FATHOM, Boston Scientific, USA) were used for superselection of tumor-feeding vessels. For subsegmental TACE, the emulsion was containing 20~60 mg of Doxorubicin (Actavis, Dublin, Ireland), 100~200mg of oxaliplatin (Sichuan Huiyu pharmaceuticals，China), 40~100mg of epirubicin (Aidasheng, Hanhui pharmaceuticals co.,Ltd，China), 500~1000mg of 5-fluorouracil (Taiji Buen, Xinan Medicine，China) and 0.5-15.0 mL iodide (Youliying, Jiangsu HengruiMedicine Co., Ltd，China) were administrated. Alternatively, DEB particles with a diameter of 100 ~300μm (CB, Jiangsu HengruiMedicine Co., Ltd，China) or 5% sodium bicarbonate (NaHCO3) was combined. Then, the deliver of 1 mm2 gelatin sponge (CB; Jiangsu HengruiMedicine Co., Ltd，China) or coil (Boston Scientific, USA) was used for embolization of the supplying artery of tumor. The amount of iodized oil was determined by tumor size and preserved liver function. The interventionist tried to embolize as all nodules as possible. Based on the subjective angiographic end points of grade II or III chemoembolization, all target tumors were evaluated with reduced anterograde flow in the tumor supplying arteries and diminished or disappeared tumor staining as the end points of successful embolization.

**Supplementary Data S3. Selection of the intratumoral and peritumoral radiomics features**

| Arterial phase | Intratumoral radiomics features | A_exponentiaI_Firstorder_Energy |
| --- | --- | --- |
| A_exponential glszm_Small Area Emphasis |
| A_exponential glszm_Small Area Low Gray Level Emphasis |
| A_wavelet_LLH_gIcm_Inverse Variance |
| Peritumoral radiomics features | A_original_glszm_Large Area High Gray Level Emphasis |
| A_exponential_firstorder_10Percentile |
| A_exponential_glrlm_Long Run Emphasis |
| A_gradient_glrlm_Long Run High Gray Level Emphasis |
| A_gradient_ngtdm_Busyness |
| A_square_firstorder_Skewness |
| A_wavelet_LHL_gldm_Small Dependence Low Gray Level Emphasis |
| A_wavelet_LHL_glszm_Size Zone Non Uniformity Normalized |
| A_wavelet_HHH_firstorder_Entropy |
| A_wavelet_HHH_glcm_Cluster Shade |
| Portal venous phase | Intratumoral radiomics features | PVP_original_glrlm_Run Length Non Uniformity |
| PVP_exponential_glrlm_Run Length Non Uniformity Normalized |
| PVP_Square_glszm_Low Gray Level zone Emphasis |
| PVP_Square_gIszm_Small Area High Gray LeveI Emphasis |
| PVP_wavelet_HHL_glcm_MCC |
| PVP_wavelet_HHH_glcm_Inverse Variance |
| PVP_wavelet_HHH_ngtdm_Complexity |
| PVP_wavelet_LLL_glcm_MCC |
| Peritumoral radiomics features | PVP_original_gldm_Small Dependence High Gray Level Emphasis |
| PVP_logarithm_gldm_Small Dependence Low Gray Level Emphasis |
| PVP_square_glcm_Cluster Prominence |
| PVP_wavelet_LLH_glcm_Cluster Tendency |
| PVP_wavelet_LHL_glcm_Cluster Shade |
| PVP_wavelet_LHH_firstorder_Median |
| PVP_wavelet_HLL_firstorder_Mean |
| Delay venous phase | Intratumoral radiomics features | V_Square_gIszm_Large Area Low Gray LeveI Emphasis |
| V_square root_ glszm_Size Zone Non uniformity Normalized |
| V_wavelet_LLH_glrlm_Long Run High Gray LeveI Emphasis |
| V_wavelet_HLH_Firstorder_Skewness |
| Peritumoral radiomics features | V_square_gldm_Low Gray Level Emphasis |
| V_wavelet_LLH_firstorder_Mean |

**Supplementary Data S4.** **The formulae of the logistic regression model in predictive models**

The formula of all model using Logistic model was as following:

1. a clinical-raidiological model (Clinics):

Clinics = (-2.628 + 2.499 * ALBI Score + 0.517 * Tumor growth subtypes)

1. a combined intratumoral and peritumoral radiomics model (Tumor_Peritumor):

Tumor_Peritumor=(-5.868+3.047*Tumor+9.176*Peritumor)

1. three combined models based on clinical, radiological and intratumoral and peritumoral radiomics features:

(i)Clinics_Tumor = -5.737 + 4.044 * ALBI_score + 0.458 * Tumor_growth_subtypes + 6.092 * Tumor;

(ii)Clinics_Peritumor=-6.484+1.975*ALBI_score+0.056*Tumor_growth_subtypes+10.688*Peritumor;

(iii)Clinics_Tumor_Peritumor=-7.647+3.206*ALBI_score+0.110*Tumor_growth_subtypes+3.754*Tumor+8.383*Peritumor.

**Supplementary Data S5.** **Delong testing for comparison between performance of models**

| Model | Training cohort | | Validation cohort | | Testing cohort | |
| --- | --- | --- | --- | --- | --- | --- |
| P.value | Z | P.value | Z | P.value | Z |
| Clinics & Tumor | 0.181 | -1.337 | 0.944 | -0.070 | 0.769 | -0.294 |
| Clinics & Peritumor | 0.006* | -2.728 | 0.371 | -0.893 | 0.830 | -0.214 |
| Clinics & Clinics_Tumor | 0.012* | -2.499 | 0.352 | -0.931 | 0.101 | -1.640 |
| Clinics & Clinics_Peritumor | 0.001* | -3.205 | 0.120 | -1.556 | 0.720 | -0.358 |
| Clinics & Tumor_Peritumor | 0.002* | -3.024 | 0.249 | -1.153 | 0.476 | -0.712 |
| Clinics & Clinics_Tumor_Peritumor | 0.001* | -3.425 | 0.147 | -1.466 | 0.292 | -1.053 |
| Tumor & Peritumor | 0.191 | -1.307 | 0.455 | -0.747 | 0.901 | 0.125 |
| Tumor & Clinics_Tumor | 0.179 | -1.345 | 0.348 | -0.938 | 0.145 | -1.458 |
| Tumor & Clinics_Peritumor | 0.151 | -1.436 | 0.326 | -0.981 | 0.949 | 0.064 |
| Tumor & Tumor_Peritumor | 0.013* | -2.493 | 0.234 | -1.190 | 0.525 | -0.635 |
| Tumor & Clinics_Tumor_Peritumor | 0.016* | -2.399 | 0.224 | -1.215 | 0.413 | -0.817 |
| Peritumor & Clinics_Tumor | 0.566 | 0.574 | 0.836 | 0.207 | 0.257 | -1.132 |
| Peritumor & Clinics_Peritumor | 0.623 | -0.491 | 0.379 | -0.880 | 0.898 | -0.128 |
| Peritumor & Tumor_Peritumor | 0.358 | -0.919 | 0.503 | -0.669 | 0.254 | -1.139 |
| Peritumor & Clinics_Tumor_Peritumor | 0.329 | -0.976 | 0.468 | -0.725 | 0.226 | -1.210 |
| Clinics_Tumor & Clinics_Peritumor | 0.400 | -0.841 | 0.583 | -0.549 | 0.241 | 1.171 |
| Clinics_Tumor & Tumor_Peritumor | 0.156 | -1.418 | 0.610 | -0.510 | 0.471 | 0.720 |
| Clinics_Tumor & Clinics_Tumor_Peritumor | 0.053* | -1.933 | 0.496 | -0.680 | 0.418 | 0.809 |
| Clinics_Peritumor & Tumor_Peritumor | 0.654 | -0.448 | 0.851 | 0.188 | 0.469 | -0.724 |
| Clinics_Peritumor & Clinics_Tumor_Peritumor | 0.411 | -0.822 | 1 | 0 | 0.275 | -1.092 |
| Tumor_Peritumor & Clinics_Tumor_Peritumor | 0.753 | -0.313 | 0.758 | -0.308 | 0.699 | -0.387 |
